# Supplementary material
Source: PubMed Central journal article supplement (PMC7523336)
Supplement: NIHMS1604098-supplement-1.pdf [file NIHMS1604098-supplement-1.pdf]

Supplemental Figure 1 – Tracking Wave 1 Respondents Through All 3 Waves of the PATH Study

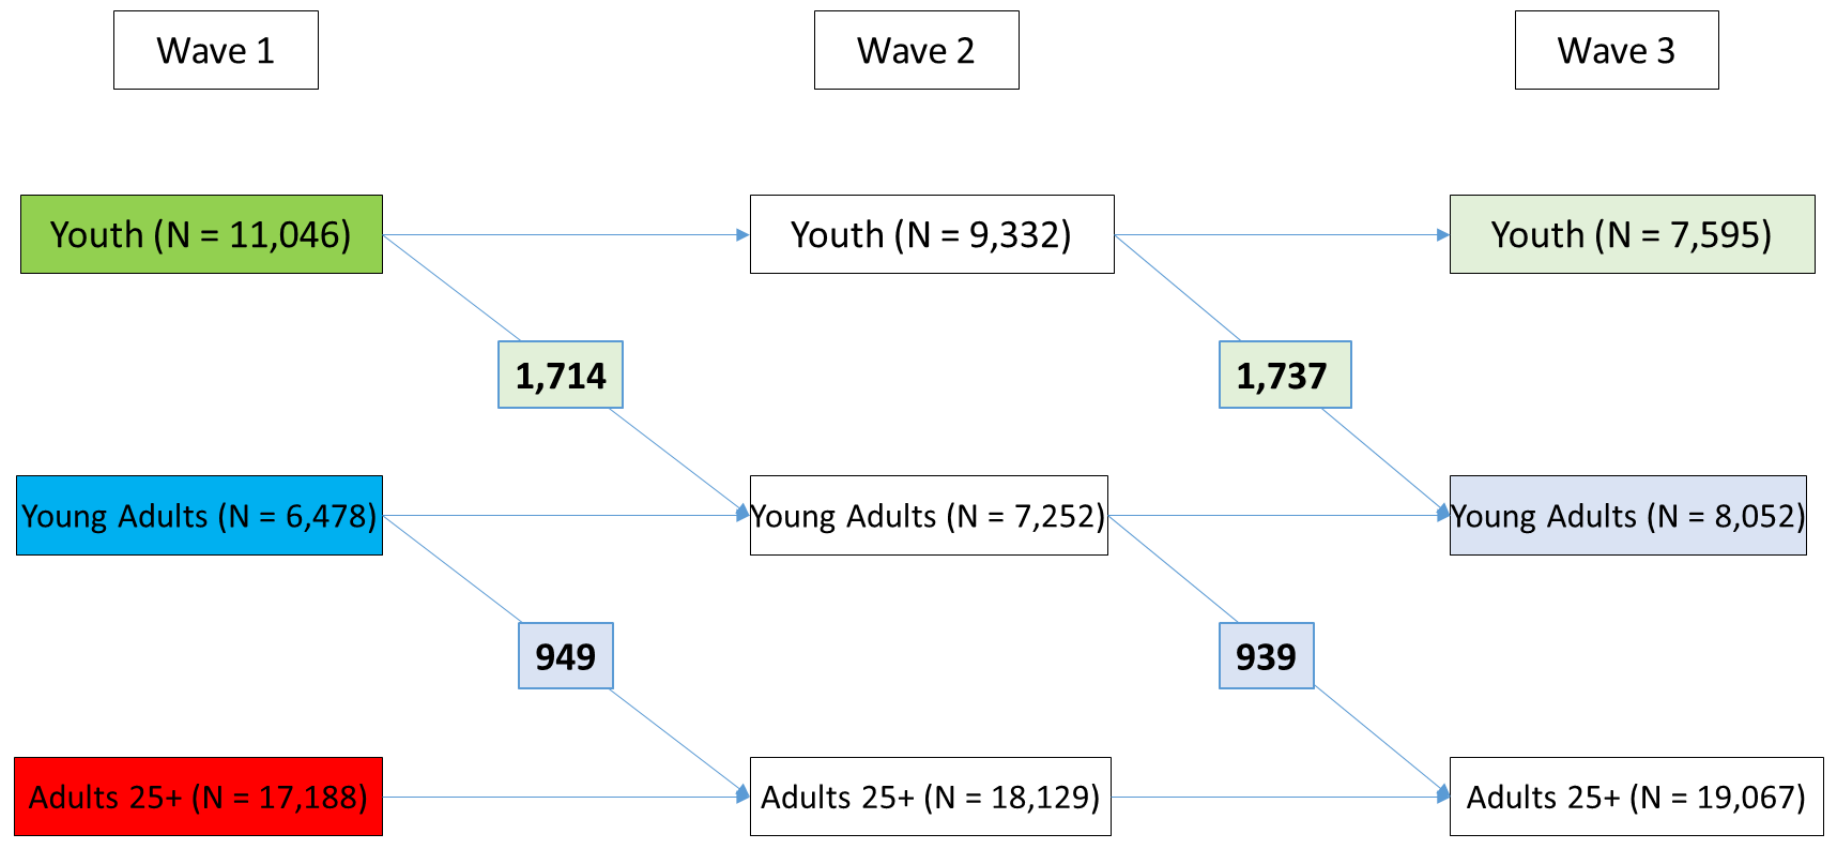

Notes:  
 Supplemental Figure 1 shows the full Wave 1 sample respondents who have data at Waves 1, 2, and 3. There are 2,605 Wave 1 youth (ages 12-17) and 8,650 Wave 1 adult (ages 18 and older) respondents excluded at W2 and W3 because they do not have data at all three waves. The figure illustrates Wave 1 youth and young adults (ages 18-24) who aged up at Wave 2 and Wave 2 youth and young adults who aged up at Wave 3. The boxes at each wave show the total sample size for each age group at each wave.

Supplemental Table 1: Cross-sectional Prevalence Estimates of Individual and Polyproduct Cigar Use Among W1 Cigar Users.

|                       | Ever Cigar Use         |                      |                           |                    |                        |                      |                           |                    |                        |                      |                           |                    |
|-----------------------|------------------------|----------------------|---------------------------|--------------------|------------------------|----------------------|---------------------------|--------------------|------------------------|----------------------|---------------------------|--------------------|
|                       | W1                     |                      |                           |                    | W2                     |                      |                           |                    | W3                     |                      |                           |                    |
|                       | Unweighted Sample Size | Weighted Sample Size | Weighted %                | 95% CI             | Unweighted Sample Size | Weighted Sample Size | Weighted %                | 95% CI             | Unweighted Sample Size | Weighted Sample Size | Weighted %                | 95% CI             |
| <i>Youth</i>          |                        |                      |                           |                    |                        |                      |                           |                    |                        |                      |                           |                    |
| <b>Cigar</b>          | <b>998</b>             | <b>1,813,038</b>     | <b>7.5<sup>a,b</sup></b>  | <b>(7.0-8.1)</b>   | <b>765</b>             | <b>1,552,011</b>     | <b>6.5<sup>a,c</sup></b>  | <b>(5.9-7.0)</b>   | <b>586</b>             | <b>1,249,148</b>     | <b>5.3<sup>b,c</sup></b>  | <b>(4.8-5.8)</b>   |
| Exclusive traditional | 68                     | 129,708              | 7.2 <sup>a</sup>          | (5.5-9.4)          | 71                     | 153,429              | 10.0 <sup>a</sup>         | (7.7-13.0)         | 51                     | 122,663              | 10.2                      | (7.6-13.6)         |
| Exclusive cigarillo   | 494                    | 884,349              | 48.9                      | (45.2-52.7)        | 342                    | 684,576              | 44.8                      | (40.8-48.9)        | 264                    | 532,532              | 44.5                      | (40.0-49.0)        |
| Exclusive filtered    | 51                     | 90,495               | 5.0                       | (3.7-6.7)          | 41                     | 82,046               | 5.4                       | (3.9-7.3)          | 38                     | 81,414               | 6.8                       | (4.6-9.8)          |
| Polycigar             | 381                    | 703,013              | 38.9                      | (35.7-42.2)        | 299                    | 607,501              | 39.8                      | (35.9-43.8)        | 212                    | 461,432              | 38.5                      | (34.7-42.5)        |
| <i>Young Adults</i>   |                        |                      |                           |                    |                        |                      |                           |                    |                        |                      |                           |                    |
| <b>Cigar</b>          | <b>5,092</b>           | <b>13,760,119</b>    | <b>45.4<sup>a,b</sup></b> | <b>(43.5-47.4)</b> | <b>4,328</b>           | <b>14,124,287</b>    | <b>47.1<sup>a</sup></b>   | <b>(45.4-48.9)</b> | <b>4,109</b>           | <b>13,587,427</b>    | <b>47.2<sup>b</sup></b>   | <b>(45.4-49.0)</b> |
| Exclusive traditional | 233                    | 764,578              | 5.6 <sup>a,b</sup>        | (4.6-6.7)          | 251                    | 1,021,058            | 7.3 <sup>a</sup>          | (6.0-8.7)          | 274                    | 1,080,776            | 8.2 <sup>b</sup>          | (6.8-9.8)          |
| Exclusive cigarillo   | 2,051                  | 5,513,251            | 40.3 <sup>a,b</sup>       | (38.6-42.0)        | 1,377                  | 4,420,907            | 31.5 <sup>a,c</sup>       | (29.6-33.4)        | 1,124                  | 3,640,249            | 27.5 <sup>b,c</sup>       | (25.6-29.5)        |
| Exclusive filtered    | 194                    | 552,119              | 4.0 <sup>a</sup>          | (3.4-4.7)          | 133                    | 458,874              | 3.3 <sup>a</sup>          | (2.6-4.0)          | 115                    | 421,467              | 3.2                       | (2.5-4.0)          |
| Polycigar             | 2,586                  | 6,855,564            | 50.1 <sup>a,b</sup>       | (48.7-51.5)        | 2,545                  | 8,153,709            | 58.0 <sup>a,c</sup>       | (56.3-59.7)        | 2,485                  | 8,101,068            | 61.2 <sup>b,c</sup>       | (59.0-63.3)        |
| <i>Adults 25+</i>     |                        |                      |                           |                    |                        |                      |                           |                    |                        |                      |                           |                    |
| <b>Cigar</b>          | <b>12,128</b>          | <b>78,528,952</b>    | <b>40.0<sup>a,b</sup></b> | <b>(38.9-41.0)</b> | <b>11,116</b>          | <b>83,674,736</b>    | <b>41.8<sup>a,c</sup></b> | <b>(40.7-43.0)</b> | <b>11,174</b>          | <b>87,003,560</b>    | <b>43.8<sup>b,c</sup></b> | <b>(42.6-44.9)</b> |
| Exclusive traditional | 1,706                  | 16,822,114           | 21.9 <sup>b</sup>         | (20.6-23.2)        | 1,464                  | 17,653,033           | 21.5                      | (20.0-23.0)        | 1,377                  | 17,712,108           | 20.9 <sup>b</sup>         | (19.5-22.4)        |
| Exclusive cigarillo   | 2,375                  | 13,936,218           | 18.1 <sup>a,b</sup>       | (17.2-19.1)        | 1,945                  | 13,185,144           | 16.0 <sup>a,c</sup>       | (15.1-17.1)        | 1,803                  | 12,541,570           | 14.8 <sup>b,c</sup>       | (13.9-15.8)        |
| Exclusive filtered    | 641                    | 3,728,078            | 4.8                       | (4.4-5.3)          | 559                    | 3,789,203            | 4.6                       | (4.1-5.2)          | 526                    | 3,835,423            | 4.5                       | (4.0-5.1)          |
| Polycigar             | 7,185                  | 42,430,025           | 55.2 <sup>a,b</sup>       | (53.8-56.5)        | 6,988                  | 47,570,688           | 57.9 <sup>a,c</sup>       | (56.5-59.3)        | 7,198                  | 50,557,901           | 59.7 <sup>b,c</sup>       | (58.2-61.2)        |

|                       | P12M Cigar Use         |                      |                           |                    |                        |                      |                           |                    |                        |                      |                           |                    |
|-----------------------|------------------------|----------------------|---------------------------|--------------------|------------------------|----------------------|---------------------------|--------------------|------------------------|----------------------|---------------------------|--------------------|
|                       | W1                     |                      |                           |                    | W2                     |                      |                           |                    | W3                     |                      |                           |                    |
|                       | Unweighted Sample Size | Weighted Sample Size | Weighted %                | 95% CI             | Unweighted Sample Size | Weighted Sample Size | Weighted %                | 95% CI             | Unweighted Sample Size | Weighted Sample Size | Weighted %                | 95% CI             |
| <i>Youth</i>          |                        |                      |                           |                    |                        |                      |                           |                    |                        |                      |                           |                    |
| <b>Cigar</b>          | <b>791</b>             | <b>1,426,017</b>     | <b>5.9<sup>a,b</sup></b>  | <b>(5.4-6.4)</b>   | <b>570</b>             | <b>1,165,747</b>     | <b>4.7<sup>a,c</sup></b>  | <b>(4.3-5.3)</b>   | <b>394</b>             | <b>860,527</b>       | <b>3.5<sup>b,c</sup></b>  | <b>(3.2-3.9)</b>   |
| Exclusive traditional | 53                     | 96,283               | 6.8                       | (5.1-8.9)          | 50                     | 108,886              | 9.5                       | (7.0-12.8)         | 33                     | 87,653               | 10.3                      | (7.4-14.2)         |
| Exclusive cigarillo   | 414                    | 733,654              | 51.7 <sup>a</sup>         | (48.1-55.4)        | 246                    | 503,649              | 43.9 <sup>a</sup>         | (39.3-48.6)        | 191                    | 394,506              | 46.5                      | (41.3-51.8)        |
| Exclusive filtered    | 30                     | 52,915               | 3.7 <sup>a</sup>          | (2.5-5.5)          | 40                     | 80,903               | 7.1 <sup>a</sup>          | (5.1-9.6)          | 30                     | 65,707               | 7.7                       | (4.9-11.9)         |
| Polycigar             | 288                    | 535,064              | 37.7                      | (34.3-41.3)        | 224                    | 453,792              | 39.6                      | (34.9-44.5)        | 135                    | 300,917              | 35.5                      | (30.9-40.3)        |
| <i>Young Adults</i>   |                        |                      |                           |                    |                        |                      |                           |                    |                        |                      |                           |                    |
| <b>Cigar</b>          | <b>3,725</b>           | <b>9,718,431</b>     | <b>32.2<sup>a,b</sup></b> | <b>(30.5-33.9)</b> | <b>2,665</b>           | <b>8,339,776</b>     | <b>27.6<sup>a,c</sup></b> | <b>(26.3-28.8)</b> | <b>2,250</b>           | <b>7,096,679</b>     | <b>23.9<sup>b,c</sup></b> | <b>(22.8-25.1)</b> |
| Exclusive traditional | 342                    | 1,041,272            | 10.8 <sup>a,b</sup>       | (9.4-12.4)         | 397                    | 1,540,359            | 18.5 <sup>a,c</sup>       | (16.2-21.1)        | 406                    | 1,497,738            | 21.1 <sup>b,c</sup>       | (18.5-24.0)        |
| Exclusive cigarillo   | 1,554                  | 3,952,776            | 41.0 <sup>a,b</sup>       | (39.1-43.0)        | 787                    | 2,277,418            | 27.3 <sup>a</sup>         | (25.3-29.4)        | 722                    | 2,116,768            | 29.9 <sup>b</sup>         | (27.7-32.1)        |
| Exclusive filtered    | 164                    | 462,835              | 4.8                       | (4.1-5.7)          | 104                    | 307,916              | 3.7                       | (3.0-4.5)          | 87                     | 294,030              | 4.1                       | (3.3-5.3)          |
| Polycigar             | 1,634                  | 4,183,114            | 43.4 <sup>a</sup>         | (41.6-45.2)        | 1,374                  | 4,208,734            | 50.5 <sup>a,c</sup>       | (48.1-52.9)        | 1,033                  | 3,180,482            | 44.9 <sup>c</sup>         | (42.2-47.5)        |
| <i>Adults 25+</i>     |                        |                      |                           |                    |                        |                      |                           |                    |                        |                      |                           |                    |
| <b>Cigar</b>          | <b>5,179</b>           | <b>24,179,206</b>    | <b>12.4<sup>a,b</sup></b> | <b>(12.0-12.9)</b> | <b>3,892</b>           | <b>22,151,196</b>    | <b>10.6<sup>a,c</sup></b> | <b>(10.3-11.0)</b> | <b>3,430</b>           | <b>20,491,323</b>    | <b>9.8<sup>b,c</sup></b>  | <b>(9.3-10.2)</b>  |
| Exclusive traditional | 1,331                  | 7,210,895            | 30.6 <sup>a,b</sup>       | (28.9-32.3)        | 1,242                  | 8,700,638            | 39.3 <sup>a</sup>         | (37.4-41.3)        | 1,044                  | 7,660,758            | 37.4 <sup>b</sup>         | (35.0-39.9)        |
| Exclusive cigarillo   | 1,138                  | 5,034,495            | 21.3 <sup>a,b</sup>       | (20.2-22.5)        | 633                    | 3,068,747            | 13.9 <sup>a,c</sup>       | (12.6-15.3)        | 652                    | 3,523,914            | 17.2 <sup>b,c</sup>       | (15.6-19.0)        |
| Exclusive filtered    | 400                    | 1,767,136            | 7.5                       | (6.7-8.4)          | 329                    | 1,670,190            | 7.5                       | (6.6-8.6)          | 300                    | 1,648,371            | 8.1                       | (6.7-9.6)          |
| Polycigar             | 2,190                  | 9,586,997            | 40.6 <sup>b</sup>         | (38.9-42.3)        | 1,683                  | 8,684,539            | 39.3                      | (37.3-41.2)        | 1,430                  | 7,628,860            | 37.3 <sup>b</sup>         | (35.1-39.5)        |

|                       | P30D Cigar Use         |                      |                          |                    |                        |                      |                         |                    |                        |                      |                           |                    |
|-----------------------|------------------------|----------------------|--------------------------|--------------------|------------------------|----------------------|-------------------------|--------------------|------------------------|----------------------|---------------------------|--------------------|
|                       | W1                     |                      |                          |                    | W2                     |                      |                         |                    | W3                     |                      |                           |                    |
|                       | Unweighted Sample Size | Weighted Sample Size | Weighted %               | 95% CI             | Unweighted Sample Size | Weighted Sample Size | Weighted %              | 95% CI             | Unweighted Sample Size | Weighted Sample Size | Weighted %                | 95% CI             |
| <i>Youth</i>          |                        |                      |                          |                    |                        |                      |                         |                    |                        |                      |                           |                    |
| <b>Cigar</b>          | <b>340</b>             | <b>608,612</b>       | <b>2.5<sup>a,b</sup></b> | <b>(2.2-2.8)</b>   | <b>180</b>             | <b>367,099</b>       | <b>1.5<sup>a</sup></b>  | <b>(1.3-1.8)</b>   | <b>136</b>             | <b>289,891</b>       | <b>1.2<sup>b</sup></b>    | <b>(1.0-1.4)</b>   |
| Exclusive traditional | 26                     | 52,074               | 8.6                      | (5.5-13.2)         | 26                     | 56,069               | 16.3                    | (11.3-23.1)        | 14                     | 34,396               | 12.7                      | (7.8-20.1)         |
| Exclusive cigarillo   | 204                    | 360,701              | 59.6 <sup>a</sup>        | (53.9-65.0)        | 72                     | 142,423              | 41.5 <sup>a</sup>       | (32.8-50.7)        | 66                     | 135,931              | 50.4                      | (40.4-60.3)        |
| Exclusive filtered    | 14                     | 24,627               | 4.1 <sup>b</sup>         | (2.5-6.4)          | 14                     | 28,402               | 8.3                     | (4.8-14.0)         | 17                     | 35,719               | 13.2 <sup>b</sup>         | (8.0-21.2)         |
| Polycigar             | 94                     | 168,232              | 27.8                     | (22.3-34.0)        | 55                     | 116,406              | 33.9                    | (26.2-42.6)        | 29                     | 63,790               | 23.6                      | (17.2-31.5)        |
| <i>Young Adults</i>   |                        |                      |                          |                    |                        |                      |                         |                    |                        |                      |                           |                    |
| <b>Cigar</b>          | <b>1,933</b>           | <b>4,737,429</b>     | <b>15.7<sup>b</sup></b>  | <b>(14.7-16.6)</b> | <b>1,649</b>           | <b>4,889,385</b>     | <b>16.2<sup>c</sup></b> | <b>(15.3-17.1)</b> | <b>1,379</b>           | <b>4,155,293</b>     | <b>14.0<sup>b,c</sup></b> | <b>(13.1-14.9)</b> |
| Exclusive traditional | 206                    | 569,176              | 12.1 <sup>a,b</sup>      | (10.6-13.8)        | 221                    | 776,984              | 15.9 <sup>a</sup>       | (13.6-18.5)        | 190                    | 670,544              | 16.1 <sup>b</sup>         | (13.9-18.6)        |
| Exclusive cigarillo   | 949                    | 2,255,404            | 47.9 <sup>a</sup>        | (45.5-50.4)        | 705                    | 2,008,302            | 41.1 <sup>a</sup>       | (38.3-44.0)        | 639                    | 1,861,290            | 44.8                      | (41.9-47.8)        |
| Exclusive filtered    | 105                    | 269,823              | 5.7                      | (4.6-7.1)          | 85                     | 256,395              | 5.3                     | (4.1-6.7)          | 55                     | 170,651              | 4.1                       | (3.0-5.6)          |
| Polycigar             | 660                    | 1,611,411            | 34.2                     | (32.1-36.4)        | 635                    | 1,840,013            | 37.7                    | (35.3-40.1)        | 494                    | 1,450,771            | 34.9                      | (31.9-38.0)        |
| <i>Adults 25+</i>     |                        |                      |                          |                    |                        |                      |                         |                    |                        |                      |                           |                    |
| <b>Cigar</b>          | <b>2,640</b>           | <b>11,540,336</b>    | <b>5.9</b>               | <b>(5.6-6.2)</b>   | <b>2,401</b>           | <b>13,059,740</b>    | <b>6.3</b>              | <b>(6.0-6.6)</b>   | <b>2,207</b>           | <b>12,395,025</b>    | <b>5.9</b>                | <b>(5.6-6.2)</b>   |
| Exclusive traditional | 691                    | 3,246,283            | 28.7                     | (26.5-30.9)        | 627                    | 4,150,552            | 32.0                    | (29.7-34.4)        | 523                    | 3,556,325            | 28.8                      | (26.2-31.5)        |
| Exclusive cigarillo   | 736                    | 3,133,746            | 27.7 <sup>a,b</sup>      | (25.9-29.5)        | 578                    | 2,773,308            | 21.4 <sup>a</sup>       | (19.5-23.5)        | 584                    | 2,943,000            | 23.8 <sup>b</sup>         | (21.8-26.0)        |
| Exclusive filtered    | 297                    | 1,271,614            | 11.2                     | (9.8-12.8)         | 300                    | 1,488,446            | 11.5                    | (9.8-13.4)         | 285                    | 1,526,707            | 12.4                      | (10.6-14.3)        |
| Polycigar             | 864                    | 3,678,236            | 32.5                     | (30.4-34.6)        | 888                    | 4,548,672            | 35.1                    | (32.6-37.6)        | 810                    | 4,330,966            | 35.0                      | (32.4-37.8)        |

|                       | Daily P30D Cigar Use   |                      |                          |                  |                        |                      |                        |                  |                        |                      |                        |                  |
|-----------------------|------------------------|----------------------|--------------------------|------------------|------------------------|----------------------|------------------------|------------------|------------------------|----------------------|------------------------|------------------|
|                       | W1                     |                      |                          |                  | W2                     |                      |                        |                  | W3                     |                      |                        |                  |
|                       | Unweighted Sample Size | Weighted Sample Size | Weighted %               | 95% CI           | Unweighted Sample Size | Weighted Sample Size | Weighted %             | 95% CI           | Unweighted Sample Size | Weighted Sample Size | Weighted %             | 95% CI           |
| <i>Youth</i>          |                        |                      |                          |                  |                        |                      |                        |                  |                        |                      |                        |                  |
| <b>Cigar</b>          | <b>11</b>              | <b>22,981</b>        | <b>0.1</b>               | <b>(0.1-0.2)</b> | <b>4</b>               | <b>8,278</b>         | <b>0.0 †</b>           | <b>(0.0-0.1)</b> | <b>8</b>               | <b>12,743</b>        | <b>0.1 †</b>           | <b>(0.0-0.1)</b> |
| Exclusive traditional | 0                      | N/A                  | N/A                      | N/A              | 1                      | 1515                 | 18.3†                  | (1.6-75.9)       | 1                      | 1122                 | 8.8†                   | (1.3-41.7)       |
| Exclusive cigarillo   | 9                      | 19,810               | 86.2† <sup>a</sup>       | (57.0-96.7)      | 1                      | 1691                 | 20.4† <sup>a</sup>     | (1.9-77.5)       | 4                      | 6883                 | 54.0†                  | (19.7-84.9)      |
| Exclusive filtered    | 1                      | 1,604                | 7.0†                     | (0.8-40.2)       | 2                      | 5072                 | 61.3†                  | (15.5-93.2)      | 1                      | 1720                 | 13.5†                  | (1.6-60.5)       |
| Polycigar             | 1                      | 1,567                | 6.8†                     | (0.9-37.3)       | 0                      | N/A                  | N/A                    | N/A              | 2                      | 3018                 | 23.7†                  | (5.0-64.5)       |
| <i>Young Adults</i>   |                        |                      |                          |                  |                        |                      |                        |                  |                        |                      |                        |                  |
| <b>Cigar</b>          | <b>202</b>             | <b>428,256</b>       | <b>1.4<sup>a,b</sup></b> | <b>(1.2-1.7)</b> | <b>92</b>              | <b>236,816</b>       | <b>0.8<sup>a</sup></b> | <b>(0.6-1.0)</b> | <b>97</b>              | <b>263,492</b>       | <b>0.9<sup>b</sup></b> | <b>(0.7-1.2)</b> |
| Exclusive traditional | 14                     | 30,377               | 8.2                      | (5.0-13.0)       | 15                     | 33486                | 16.5                   | (9.7-26.7)       | 16                     | 46560                | 20.2                   | (11.2-33.6)      |
| Exclusive cigarillo   | 124                    | 262,340              | 70.4 <sup>a,b</sup>      | (63.9-76.2)      | 36                     | 95758                | 47.2 <sup>a</sup>      | (35.3-59.4)      | 41                     | 111551               | 48.4 <sup>b</sup>      | (36.9-60.1)      |
| Exclusive filtered    | 6                      | 11,259               | 3.0† <sup>a,b</sup>      | (1.5-5.9)        | 21                     | 55723                | 27.5 <sup>a</sup>      | (17.9-39.8)      | 14                     | 39757                | 17.2 <sup>b</sup>      | (9.5-29.2)       |
| Polycigar             | 32                     | 68,509               | 18.4                     | (13.6-24.4)      | 7                      | 17836                | 8.8†                   | (4.1-17.7)       | 13                     | 32779                | 14.2                   | (7.7-24.7)       |
| <i>Adults 25+</i>     |                        |                      |                          |                  |                        |                      |                        |                  |                        |                      |                        |                  |
| <b>Cigar</b>          | <b>485</b>             | <b>1,975,652</b>     | <b>1.0<sup>a,b</sup></b> | <b>(0.9-1.1)</b> | <b>338</b>             | <b>1,682,154</b>     | <b>0.8<sup>a</sup></b> | <b>(0.7-0.9)</b> | <b>331</b>             | <b>1,717,505</b>     | <b>0.8<sup>b</sup></b> | <b>(0.7-1.0)</b> |
| Exclusive traditional | 65                     | 270,641              | 15.3                     | (11.7-19.9)      | 48                     | 221621               | 14.7                   | (10.6-20.1)      | 41                     | 250563               | 16.4                   | (10.7-24.3)      |
| Exclusive cigarillo   | 128                    | 515,908              | 29.3                     | (24.7-34.3)      | 84                     | 403139               | 26.8                   | (21.7-32.7)      | 88                     | 417788               | 27.3                   | (21.5-34.0)      |
| Exclusive filtered    | 142                    | 565,041              | 32.0 <sup>a,b</sup>      | (26.9-37.7)      | 134                    | 665631               | 44.3 <sup>a</sup>      | (36.3-52.6)      | 127                    | 653330               | 42.7 <sup>b</sup>      | (35.7-50.1)      |
| Polycigar             | 99                     | 411,986              | 23.4 <sup>a,b</sup>      | (18.8-28.6)      | 45                     | 212506               | 14.1 <sup>a</sup>      | (10.6-18.7)      | 39                     | 207931               | 13.6 <sup>b</sup>      | (9.8-18.5)       |

1 Notes:

2 Abbreviations: Wave 1 = W1 = Wave 1; Wave 2 = W2 = Wave 2; Wave 3 = W3 = Wave 3; CI = confidence interval; P12M = past 12-month; P30D = past 30-day; N/A =  
3 not applicable  
4

5  
6 Analysis included W1, W2, and W3 youth (ages 12-17), young adults (ages 18-24), and adults 25+ (ages 25 and older) at each wave. All respondents with data at one  
7 wave are included in the sample for that wave's estimate and do not need to have complete data at all three waves. The PATH Study cross-sectional (W1) or single-wave  
8 weights (W2 and W3) were used to calculate estimates at each wave.  
9

10 For exclusive product use, a respondent could only use that specific product, and for polycigar use, a respondent needed to use two or more products. For overall cigar  
11 use, a respondent could use any of the products, exclusively or combined. The exclusive cigar product Ns combined with the polycigar N does not add up to the overall  
12 cigar N due to missing data. It is possible for one respondent to have valid data for one product and missing data for another, making it impossible to determine exclusive  
13 or polyproduct use, but allowing them to be in the overall cigar group.  
14  
15

16 Ever cigar use is defined as having ever used a traditional cigar, cigarillo, and/or filtered cigar, even once or twice in lifetime. P12M cigar use is defined as any traditional  
17 cigar, cigarillo, and/or filtered cigar use within the past 12-months. P30D cigar use is defined as any traditional cigar, cigarillo, and/or filtered cigar use within the past 30  
18 days. Daily P30D cigar use is defined as use of traditional cigars, cigarillos, and/or filtered cigars on all 30 of the past 30 days.  
19  
20

21 <sup>a</sup>denotes significant difference at  $p < 0.0167$  (Bonferroni corrected for three comparisons) between W1 and W2

22 <sup>b</sup>denotes significant difference at  $p < 0.0167$  (Bonferroni corrected for three comparisons) between W1 and W3

23 <sup>c</sup>denotes significant difference at  $p < 0.0167$  (Bonferroni corrected for three comparisons) between W2 and W3  
24

25 The logit-transformation method was used to calculate the 95% CIs.

26 †Estimate should be interpreted with caution because it has low statistical precision. It is based on a denominator sample size of less than 50, or the coefficient of variation  
27 of the estimate or its complement is larger than 30%.  
28  
29

30 Analyses were run on the W1, W2, and W3 Public Use Files (<https://doi.org/10.3886/ICPSR36498.v8>).  
31  
32  
33  
34  
35  
36  
37  
38  
39  
40  
41  
42  
43  
44  
45  
46  
47

Supplemental Figure 2: Conceptual Model of Use Pathways Among W1 Cigar Use Groups Across W1-W2-W3

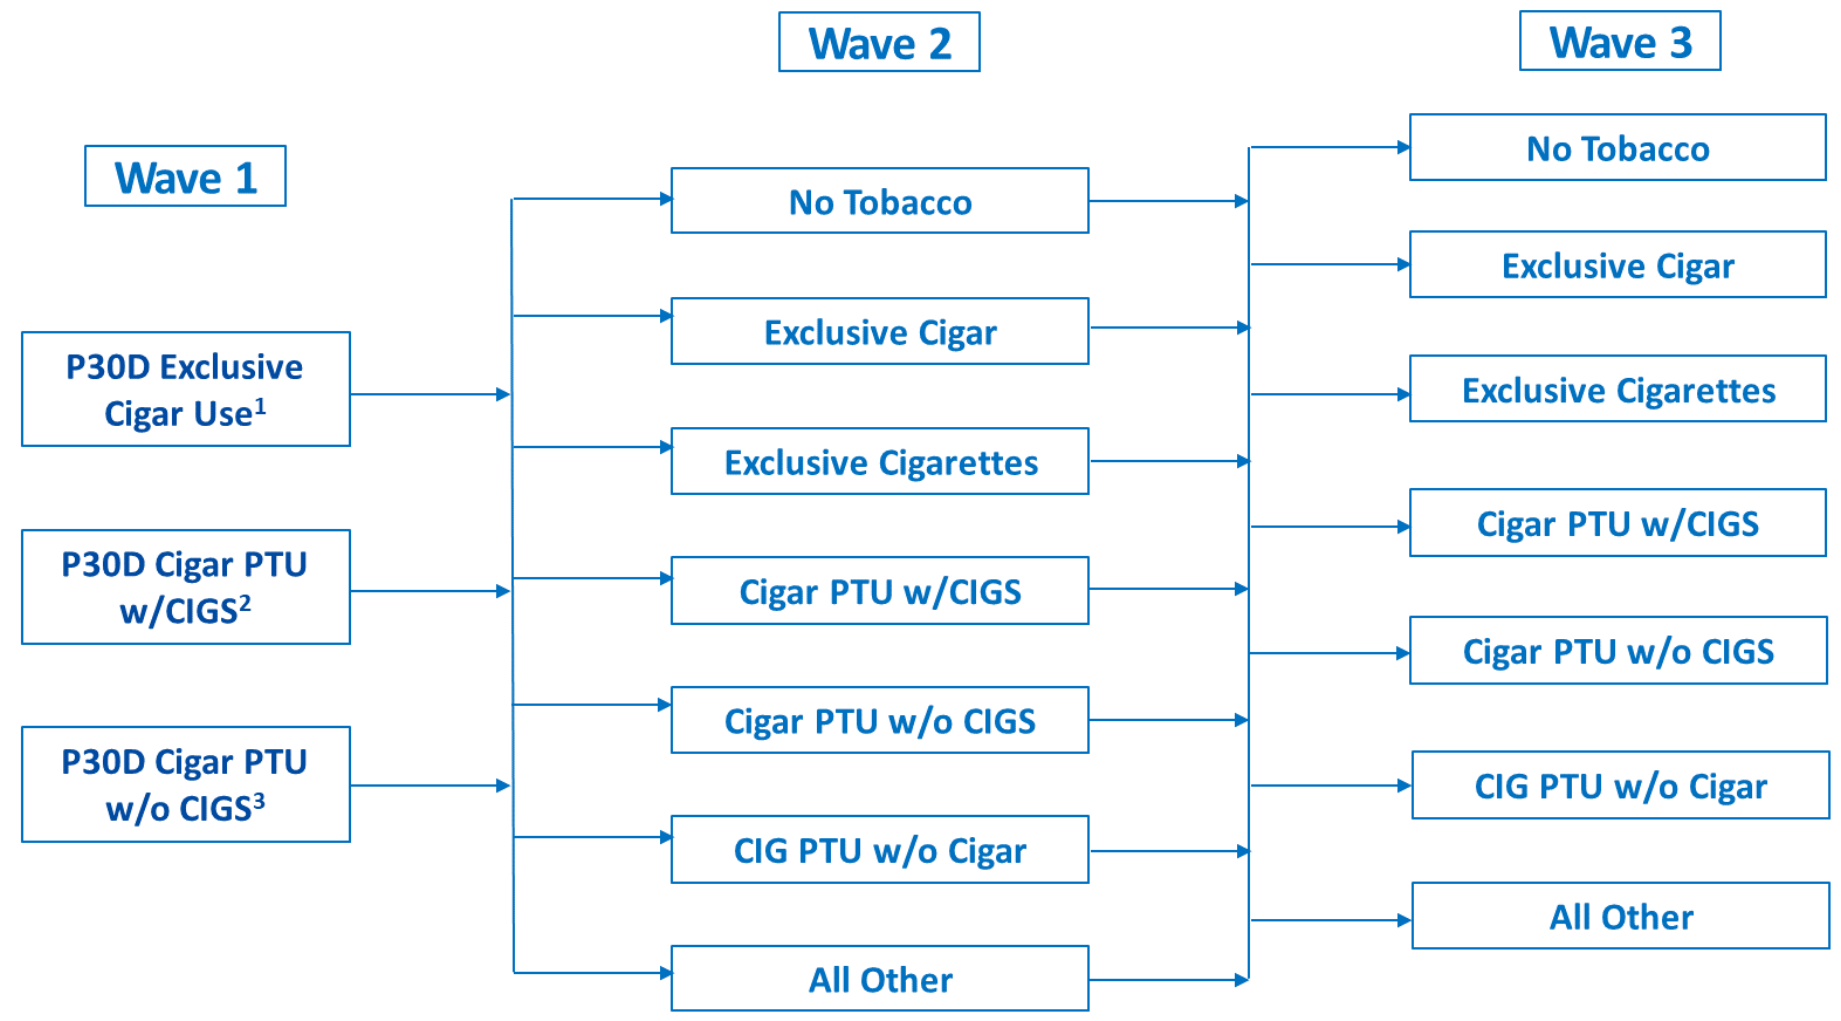

## Notes:

Abbreviations: W1 = Wave 1; W2 = Wave 2; W3 = Wave 3; P30D = past 30-day; PTU = polytobacco use; w/ = with; CIG(S) = cigarette(s); w/o = without

<sup>1</sup>Weighted percentages (95% confidence interval) and unweighted sample sizes of W1 P30D exclusive cigar users among P30D cigar users: youth (ages 12-17), 23.3% (18.4-29.1), N = 64/265; young adults (ages 18-24), 18.7% (16.6-21.0), N = 245/1351; adults 25+ (ages 25 and older), 29.0% (26.1-32.0), N = 476/1934

<sup>2</sup>Weighted percentages (95% confidence interval) and unweighted sample sizes of W1 P30D cigar PTU w/CIGS among P30D cigar users: youth, 55.0% (47.6-62.3), N = 151/265; young adults, 68.0% (64.8-71.0), N = 945/1351; adults 25+, 63.9% (60.9-66.9), N = 1320/1934

<sup>3</sup>Weighted percentages (95% confidence interval) and unweighted sample sizes of W1 P30D cigar PTU w/o CIGS among P30D cigar users: youth, 21.6% (15.7-29.0), N = 50/265; young adults, 13.3% (11.0-16.1), N = 161/1351; adults 25+, 7.1% (5.9-8.5), N = 138/1934

1) No tobacco: Defined as no use of any tobacco products within the past 30 days.

2) Exclusive cigar: Defined as use of only traditional cigars, cigarillos, and/or filtered cigars within the past 30 days.

3) Exclusive cigarettes: Defined as use of only cigarettes within the past 30 days.

4) Cigar PTU w/CIGS: Defined as use of traditional cigars, cigarillos, and/or filtered cigars and cigarettes within the past 30 days and possibly one or more of the following: hookah, electronic nicotine delivery system (ENDS\*), pipe, or any smokeless tobacco.

5) Cigar PTU w/o CIGS: Defined as use of traditional cigars, cigarillos, and/or filtered cigars and one or more of the following within the past 30 days: hookah, ENDS, pipe, or any smokeless tobacco, but not cigarettes.

6) CIG PTU w/o cigar: Defined as use of cigarettes and one or more of the following within the past 30 days: hookah, ENDS, pipe, or any smokeless tobacco but not traditional cigars, cigarillos, or filtered cigars.

7) All other: Use of one or more of the following in the past 30 days: hookah, ENDS, pipe, or any smokeless tobacco, but without cigarettes, traditional cigars, cigarillos, or filtered cigars.

\*Respondents were asked about P30D use of “e-cigarettes” at W1 and W2 and “e-products” (e-cigarettes, e-cigars, e-pipes, and e-hookah) at W3.

These pathways have been enumerated in Supplemental Tables 2a-2c.

The logit-transformation method was used to calculate the 95% confidence intervals.

Analyses were run on the W1, W2, and W3 Public Use Files (<https://doi.org/10.3886/ICPSR36498.v8>).



Supplemental Table 2a: Transitions in P30D Product Use at W2 and W3 Among W1 P30D Exclusive Cigar Users.

| Rows | W1              | W2                   | W3                   | Youth        |            |            |             | Young Adults |            |            |             | Adults 25+   |            |            |             |
|------|-----------------|----------------------|----------------------|--------------|------------|------------|-------------|--------------|------------|------------|-------------|--------------|------------|------------|-------------|
|      |                 |                      |                      | Unweighted N | Weighted N | Weighted % | 95% CI      | Unweighted N | Weighted N | Weighted % | 95% CI      | Unweighted N | Weighted N | Weighted % | 95% CI      |
| 1    | Exclusive Cigar | No Tobacco           | No Tobacco           | 15           | 31,470     | 24.3       | (15.3-36.4) | 56           | 244,023    | 28.1       | (21.8-35.4) | 115          | 880,465    | 27.5       | (23.4-32.1) |
| 2    | Exclusive Cigar | No Tobacco           | Exclusive Cigar      | 1            | 2,141      | 1.7†       | (0.3-10.0)  | 15           | 48,794     | 5.6        | (3.2-9.7)   | 28           | 187,193    | 5.9        | (4.1-8.4)   |
| 3    | Exclusive Cigar | No Tobacco           | Exclusive Cigarettes | 1            | 1,321      | 1.0†       | (0.1-8.8)   | 3            | 11,043     | 1.3†       | (0.5-3.4)   | 2            | 12,085     | 0.4†       | (0.1-1.5)   |
| 4    | Exclusive Cigar | No Tobacco           | Cigar PTU w/CIGS     | 1            | 1,620      | 1.3†       | (0.2-8.5)   | 4            | 16,235     | 1.9†       | (0.6-5.8)   | 4            | 21,851     | 0.7†       | (0.2-1.9)   |
| 5    | Exclusive Cigar | No Tobacco           | Cigar PTU w/o CIGS   | 2            | 3,724      | 2.9†       | (0.6-12.2)  | 0            | N/A        | N/A        | N/A         | 2            | 7,483      | 0.2†       | (0.1-1.0)   |
| 6    | Exclusive Cigar | No Tobacco           | CIG PTU w/o Cigar    | 0            | N/A        | N/A        | N/A         | 1            | 2,953      | 0.3†       | (0.0-2.5)   | 0            | N/A        | N/A        | N/A         |
| 7    | Exclusive Cigar | No Tobacco           | All Other            | 5            | 10,520     | 8.1†       | (3.0-20.2)  | 5            | 19,173     | 2.2†       | (0.8-5.7)   | 7            | 57,610     | 1.8†       | (0.9-3.6)   |
| 8    | Exclusive Cigar | Exclusive Cigar      | No Tobacco           | 2            | 4,988      | 3.9†       | (0.9-14.8)  | 23           | 80,761     | 9.3        | (5.7-14.9)  | 51           | 304,969    | 9.5        | (7.1-12.7)  |
| 9    | Exclusive Cigar | Exclusive Cigar      | Exclusive Cigar      | 4            | 6,930      | 5.4†       | (1.9-14.3)  | 15           | 44,092     | 5.1        | (2.9-8.8)   | 148          | 974,595    | 30.5       | (25.7-35.7) |
| 10   | Exclusive Cigar | Exclusive Cigar      | Exclusive Cigarettes | 1            | 1,363      | 1.1†       | (0.1-7.4)   | 0            | N/A        | N/A        | N/A         | 3            | 16,048     | 0.5†       | (0.1-1.8)   |
| 11   | Exclusive Cigar | Exclusive Cigar      | Cigar PTU w/CIGS     | 1            | 1,628      | 1.3†       | (0.2-8.3)   | 2            | 6,049      | 0.7†       | (0.2-2.7)   | 6            | 41,616     | 1.3†       | (0.5-3.3)   |
| 12   | Exclusive Cigar | Exclusive Cigar      | Cigar PTU w/o CIGS   | 1            | 1,579      | 1.2†       | (0.2-8.8)   | 6            | 20,620     | 2.4†       | (1.0-5.3)   | 6            | 36,382     | 1.1†       | (0.4-2.9)   |
| 13   | Exclusive Cigar | Exclusive Cigar      | CIG PTU w/o Cigar    | 0            | N/A        | N/A        | N/A         | 2            | 5,570      | 0.6†       | (0.2-2.5)   | 2            | 9,867      | 0.3†       | (0.1-1.3)   |
| 14   | Exclusive Cigar | Exclusive Cigar      | All Other            | 1            | 2,633      | 2.0†       | (0.3-12.3)  | 1            | 5,739      | 0.7†       | (0.1-4.6)   | 1            | 7,698      | 0.2†       | (0.0-1.8)   |
| 15   | Exclusive Cigar | Exclusive Cigarettes | No Tobacco           | 1            | 2,331      | 1.8†       | (0.2-12.2)  | 2            | 8,673      | 1.0†       | (0.2-4.1)   | 6            | 41,717     | 1.3†       | (0.5-3.3)   |
| 16   | Exclusive Cigar | Exclusive Cigarettes | Exclusive Cigar      | 0            | N/A        | N/A        | N/A         | 0            | N/A        | N/A        | N/A         | 1            | 3,637      | 0.1†       | (0.0-0.7)   |
| 17   | Exclusive Cigar | Exclusive Cigarettes | Exclusive Cigarettes | 0            | N/A        | N/A        | N/A         | 7            | 27,774     | 3.2†       | (1.3-7.7)   | 2            | 17,297     | 0.5†       | (0.1-2.2)   |
| 18   | Exclusive Cigar | Exclusive Cigarettes | Cigar PTU w/CIGS     | 0            | N/A        | N/A        | N/A         | 1            | 2,646      | 0.3†       | (0.0-2.2)   | 1            | 10,270     | 0.3†       | (0.0-2.2)   |
| 19   | Exclusive Cigar | Exclusive Cigarettes | Cigar PTU w/o CIGS   | 0            | N/A        | N/A        | N/A         | 0            | N/A        | N/A        | N/A         | 0            | N/A        | N/A        | N/A         |
| 20   | Exclusive Cigar | Exclusive Cigarettes | CIG PTU w/o Cigar    | 0            | N/A        | N/A        | N/A         | 1            | 3,840      | 0.4†       | (0.1-3.2)   | 1            | 8,163      | 0.3†       | (0.0-1.9)   |
| 21   | Exclusive Cigar | Exclusive Cigarettes | All Other            | 1            | 2,025      | 1.6†       | (0.2-11.2)  | 0            | N/A        | N/A        | N/A         | 0            | N/A        | N/A        | N/A         |
| 22   | Exclusive Cigar | Cigar PTU w/CIGS     | No Tobacco           | 1            | 1,923      | 1.5†       | (0.2-10.1)  | 6            | 17,021     | 2.0†       | (0.7-5.2)   | 3            | 19,189     | 0.6†       | (0.2-2.0)   |
| 23   | Exclusive Cigar | Cigar PTU w/CIGS     | Exclusive Cigar      | 1            | 4,477      | 3.5†       | (0.5-20.8)  | 8            | 24,537     | 2.8†       | (1.4-5.5)   | 21           | 144,335    | 4.5        | (2.7-7.3)   |
| 24   | Exclusive Cigar | Cigar PTU w/CIGS     | Exclusive Cigarettes | 1            | 2,542      | 2.0†       | (0.3-12.7)  | 3            | 7,993      | 0.9†       | (0.3-3.2)   | 3            | 13,509     | 0.4†       | (0.1-1.4)   |
| 25   | Exclusive Cigar | Cigar PTU w/CIGS     | Cigar PTU w/CIGS     | 1            | 2,443      | 1.9†       | (0.3-12.3)  | 24           | 68,974     | 7.9        | (5.4-11.5)  | 18           | 111,926    | 3.5        | (2.0-6.0)   |
| 26   | Exclusive Cigar | Cigar PTU w/CIGS     | Cigar PTU w/o CIGS   | 1            | 5,367      | 4.2†       | (0.5-25.4)  | 8            | 24,743     | 2.8†       | (1.3-6.0)   | 3            | 15,896     | 0.5†       | (0.2-1.5)   |
| 27   | Exclusive Cigar | Cigar PTU w/CIGS     | CIG PTU w/o Cigar    | 1            | 3,713      | 2.9†       | (0.4-18.2)  | 1            | 3,203      | 0.4†       | (0.0-2.9)   | 2            | 11,715     | 0.4†       | (0.1-1.5)   |
| 28   | Exclusive Cigar | Cigar PTU w/CIGS     | All Other            | 1            | 5,732      | 4.4†       | (0.5-28.4)  | 1            | 6,806      | 0.8†       | (0.1-5.5)   | 2            | 20,435     | 0.6†       | (0.1-3.2)   |
| 29   | Exclusive Cigar | Cigar PTU w/o CIGS   | No Tobacco           | 0            | N/A        | N/A        | N/A         | 11           | 36,370     | 4.2        | (2.4-7.3)   | 2            | 8,181      | 0.3†       | (0.1-1.1)   |
| 30   | Exclusive Cigar | Cigar PTU w/o CIGS   | Exclusive Cigar      | 0            | N/A        | N/A        | N/A         | 6            | 18,806     | 2.2†       | (0.9-5.1)   | 11           | 93,015     | 2.9†       | (1.3-6.4)   |
| 31   | Exclusive Cigar | Cigar PTU w/o CIGS   | Exclusive Cigarettes | 0            | N/A        | N/A        | N/A         | 0            | N/A        | N/A        | N/A         | 1            | 3,842      | 0.1†       | (0.0-1.0)   |
| 32   | Exclusive Cigar | Cigar PTU w/o CIGS   | Cigar PTU w/CIGS     | 1            | 2,957      | 2.3†       | (0.3-15.0)  | 4            | 12,169     | 1.4†       | (0.5-4.1)   | 3            | 25,702     | 0.8†       | (0.2-3.0)   |
| 33   | Exclusive Cigar | Cigar PTU w/o CIGS   | Cigar PTU w/o CIGS   | 2            | 5,282      | 4.1†       | (1.0-15.1)  | 4            | 11,933     | 1.4†       | (0.5-4.0)   | 5            | 34,238     | 1.1†       | (0.4-2.9)   |
| 34   | Exclusive Cigar | Cigar PTU w/o CIGS   | CIG PTU w/o Cigar    | 0            | N/A        | N/A        | N/A         | 3            | 9,752      | 1.1†       | (0.3-3.6)   | 0            | N/A        | N/A        | N/A         |
| 35   | Exclusive Cigar | Cigar PTU w/o CIGS   | All Other            | 1            | 484        | 0.4†       | (0.1-2.7)   | 1            | 2,537      | 0.3†       | (0.0-1.9)   | 0            | N/A        | N/A        | N/A         |
| 36   | Exclusive Cigar | CIG PTU w/o Cigar    | No Tobacco           | 0            | N/A        | N/A        | N/A         | 3            | 6,238      | 0.7†       | (0.2-2.3)   | 2            | 11,841     | 0.4†       | (0.1-1.6)   |
| 37   | Exclusive Cigar | CIG PTU w/o Cigar    | Exclusive Cigar      | 0            | N/A        | N/A        | N/A         | 0            | N/A        | N/A        | N/A         | 0            | N/A        | N/A        | N/A         |
| 38   | Exclusive Cigar | CIG PTU w/o Cigar    | Exclusive Cigarettes | 1            | 1,963      | 1.5†       | (0.2-11.2)  | 1            | 4,840      | 0.6†       | (0.1-3.9)   | 1            | 5,325      | 0.2†       | (0.0-1.2)   |
| 39   | Exclusive Cigar | CIG PTU w/o Cigar    | Cigar PTU w/CIGS     | 1            | 1,581      | 1.2†       | (0.2-8.1)   | 1            | 3,385      | 0.4†       | (0.1-2.8)   | 0            | N/A        | N/A        | N/A         |
| 40   | Exclusive Cigar | CIG PTU w/o Cigar    | Cigar PTU w/o CIGS   | 0            | N/A        | N/A        | N/A         | 1            | 4,441      | 0.5†       | (0.1-3.7)   | 1            | 9,203      | 0.3†       | (0.0-2.2)   |
| 41   | Exclusive Cigar | CIG PTU w/o Cigar    | CIG PTU w/o Cigar    | 1            | 1,416      | 1.1†       | (0.1-8.3)   | 1            | 5,578      | 0.6†       | (0.1-4.7)   | 0            | N/A        | N/A        | N/A         |
| 42   | Exclusive Cigar | CIG PTU w/o Cigar    | All Other            | 0            | N/A        | N/A        | N/A         | 1            | 3,603      | 0.4†       | (0.1-2.5)   | 0            | N/A        | N/A        | N/A         |
| 43   | Exclusive Cigar | All Other            | No Tobacco           | 1            | 2,894      | 2.2†       | (0.3-15.3)  | 0            | N/A        | N/A        | N/A         | 2            | 14,870     | 0.5†       | (0.1-2.2)   |
| 44   | Exclusive Cigar | All Other            | Exclusive Cigar      | 1            | 2,601      | 2.0†       | (0.3-13.3)  | 1            | 6,130      | 0.7†       | (0.1-5.2)   | 1            | 7,029      | 0.2†       | (0.0-1.7)   |
| 45   | Exclusive Cigar | All Other            | Exclusive Cigarettes | 0            | N/A        | N/A        | N/A         | 1            | 2,514      | 0.3†       | (0.0-1.9)   | 0            | N/A        | N/A        | N/A         |
| 46   | Exclusive Cigar | All Other            | Cigar PTU w/CIGS     | 1            | 1,998      | 1.5†       | (0.2-11.2)  | 0            | N/A        | N/A        | N/A         | 0            | N/A        | N/A        | N/A         |
| 47   | Exclusive Cigar | All Other            | Cigar PTU w/o CIGS   | 2            | 2,868      | 2.2†       | (0.5-8.9)   | 4            | 15,675     | 1.8†       | (0.6-5.3)   | 0            | N/A        | N/A        | N/A         |
| 48   | Exclusive Cigar | All Other            | CIG PTU w/o Cigar    | 0            | N/A        | N/A        | N/A         | 1            | 3,057      | 0.4†       | (0.0-2.6)   | 1            | 2,619      | 0.1†       | (0.0-0.7)   |
| 49   | Exclusive Cigar | All Other            | All Other            | 2            | 4,775      | 3.7†       | (0.8-15.4)  | 5            | 20,390     | 2.3†       | (0.8-6.9)   | 1            | 5,623      | 0.2†       | (0.0-1.3)   |

## Notes:

Abbreviations: P30D = past 30-day; W2 = Wave 2; W3 = Wave 3; W1 = Wave 1; CI = confidence interval; PTU = polytobacco use; w/ = with; CIG(S) = cigarette(s); w/o = without; N/A = not applicable

The analysis included youth (ages 12-17), young adult (ages 18-24), and adult 25+ (ages 25 and older) W1 P30D exclusive cigar users with data at all three waves. Age was calculated based on age at W1. W3 longitudinal (all-waves) weights were used to calculate estimates.

The weighted percentages for some constructs such as discontinued tobacco and persistent use in this table may not match exactly with those presented in Table 1. This is the result of different denominators. In this table there can be no missing values on tobacco use variables at any wave. Table 1 does not require this restriction since some outcomes reflect behaviors at W3 (e.g. discontinued use by W3), regardless of missing data at Wave 2.

For transitions between waves:

- 1) No tobacco: Defined as no use of any tobacco products within the past 30 days.
- 2) Exclusive cigar: Defined as use of only traditional cigars, cigarillos, and/or filtered cigars within the past 30 days.
- 3) Exclusive cigarettes: Defined as use of only cigarettes within the past 30 days.
- 4) Cigar PTU w/CIGS: Defined as use of traditional cigars, cigarillos, and/or filtered cigars and cigarettes within the past 30 days and possibly one or more of the following: hookah, electronic nicotine delivery system (ENDS\*), pipe, or any smokeless tobacco.
- 5) Cigar PTU w/o CIGS: Defined as use of traditional cigars, cigarillos, and/or filtered cigars and one or more of the following within the past 30 days: hookah, ENDS, pipe, or any smokeless tobacco, but not cigarettes.
- 6) CIG PTU w/o cigar: Defined as use of cigarettes and one or more of the following within the past 30 days: hookah, ENDS, pipe, or any smokeless tobacco but not traditional cigars, cigarillos, or filtered cigars.
- 7) All other: Use of one or more of the following in the past 30 days: hookah, ENDS, pipe, or any smokeless tobacco, but without cigarettes, traditional cigars, cigarillos, or filtered cigars.

\*Respondents were asked about P30D use of "e-cigarettes" at W1 and W2 and "e-products" (e-cigarettes, e-cigars, e-pipes, and e-hookah) at W3.

The logit-transformation method was used to calculate the 95% CIs.

† Estimate should be interpreted with caution because it has low statistical precision. It is based on a denominator sample size of less than 50, or the coefficient of variation of the estimate or its complement is larger than 30%.

Analyses were run on the W1, W2, and W3 Public Use Files (<https://doi.org/10.3886/ICPSR36498.v8>).

Supplemental Table 2b: Transitions in P30D Product Use at W2 and W3 Among W1 P30D Cigar Polytobacco Users w/CIGS.

| Rows | W1               | W2                   | W3                   | Youth        |            |                  |             | Young Adults |            |                  |             | Adults 25+   |            |                  |             |
|------|------------------|----------------------|----------------------|--------------|------------|------------------|-------------|--------------|------------|------------------|-------------|--------------|------------|------------------|-------------|
|      |                  |                      |                      | Unweighted N | Weighted N | Weighted %       | 95% CI      | Unweighted N | Weighted N | Weighted %       | 95% CI      | Unweighted N | Weighted N | Weighted %       | 95% CI      |
| 1    | Cigar PTU w/CIGS | No Tobacco           | No Tobacco           | 10           | 20,973     | 6.7 <sup>†</sup> | (3.5-12.6)  | 37           | 124,305    | 4.0              | (2.6-6.0)   | 32           | 186,863    | 2.7              | (1.9-3.8)   |
| 2    | Cigar PTU w/CIGS | No Tobacco           | Exclusive Cigar      | 0            | N/A        | N/A              | N/A         | 1            | 3,737      | 0.1 <sup>†</sup> | (0.0-0.9)   | 5            | 31,157     | 0.4 <sup>†</sup> | (0.2-1.2)   |
| 3    | Cigar PTU w/CIGS | No Tobacco           | Exclusive Cigarettes | 2            | 4,112      | 1.3 <sup>†</sup> | (0.3-5.1)   | 13           | 48,694     | 1.6 <sup>†</sup> | (0.8-3.1)   | 6            | 33,956     | 0.5 <sup>†</sup> | (0.2-1.2)   |
| 4    | Cigar PTU w/CIGS | No Tobacco           | Cigar PTU w/CIGS     | 5            | 10,875     | 3.5 <sup>†</sup> | (1.2-9.5)   | 12           | 37,326     | 1.2 <sup>†</sup> | (0.6-2.3)   | 8            | 56,962     | 0.8 <sup>†</sup> | (0.4-1.8)   |
| 5    | Cigar PTU w/CIGS | No Tobacco           | Cigar PTU w/o CIGS   | 0            | N/A        | N/A              | N/A         | 2            | 7,501      | 0.2 <sup>†</sup> | (0.1-1.0)   | 1            | 6,867      | 0.1 <sup>†</sup> | (0.0-0.7)   |
| 6    | Cigar PTU w/CIGS | No Tobacco           | CIG PTU w/o Cigar    | 2            | 3,952      | 1.3 <sup>†</sup> | (0.3-5.3)   | 5            | 15,746     | 0.5 <sup>†</sup> | (0.2-1.3)   | 2            | 15,446     | 0.2 <sup>†</sup> | (0.0-1.1)   |
| 7    | Cigar PTU w/CIGS | No Tobacco           | All Other            | 5            | 16,375     | 5.3 <sup>†</sup> | (2.7-10.0)  | 12           | 43,379     | 1.4 <sup>†</sup> | (0.7-2.6)   | 4            | 25,571     | 0.4 <sup>†</sup> | (0.1-1.2)   |
| 8    | Cigar PTU w/CIGS | Exclusive Cigar      | No Tobacco           | 2            | 4,351      | 1.4 <sup>†</sup> | (0.3-5.8)   | 8            | 20,407     | 0.7 <sup>†</sup> | (0.3-1.4)   | 2            | 10,303     | 0.1 <sup>†</sup> | (0.0-0.7)   |
| 9    | Cigar PTU w/CIGS | Exclusive Cigar      | Exclusive Cigar      | 0            | N/A        | N/A              | N/A         | 5            | 16,838     | 0.5 <sup>†</sup> | (0.2-1.4)   | 7            | 39,789     | 0.6 <sup>†</sup> | (0.3-1.3)   |
| 10   | Cigar PTU w/CIGS | Exclusive Cigar      | Exclusive Cigarettes | 0            | N/A        | N/A              | N/A         | 2            | 5,495      | 0.2 <sup>†</sup> | (0.0-0.7)   | 2            | 8,246      | 0.1 <sup>†</sup> | (0.0-0.5)   |
| 11   | Cigar PTU w/CIGS | Exclusive Cigar      | Cigar PTU w/CIGS     | 4            | 7,316      | 2.4 <sup>†</sup> | (0.8-6.4)   | 3            | 10,592     | 0.3 <sup>†</sup> | (0.1-1.0)   | 5            | 30,335     | 0.4 <sup>†</sup> | (0.1-1.4)   |
| 12   | Cigar PTU w/CIGS | Exclusive Cigar      | Cigar PTU w/o CIGS   | 0            | N/A        | N/A              | N/A         | 1            | 2,524      | 0.1 <sup>†</sup> | (0.0-0.6)   | 3            | 10,888     | 0.2 <sup>†</sup> | (0.0-0.5)   |
| 13   | Cigar PTU w/CIGS | Exclusive Cigar      | CIG PTU w/o Cigar    | 0            | N/A        | N/A              | N/A         | 1            | 2,961      | 0.1 <sup>†</sup> | (0.0-0.7)   | 1            | 3,798      | 0.1 <sup>†</sup> | (0.0-0.4)   |
| 14   | Cigar PTU w/CIGS | Exclusive Cigar      | All Other            | 0            | N/A        | N/A              | N/A         | 0            | N/A        | N/A              | N/A         | 1            | 8,513      | 0.1 <sup>†</sup> | (0.0-0.9)   |
| 15   | Cigar PTU w/CIGS | Exclusive Cigarettes | No Tobacco           | 1            | 3,391      | 1.1 <sup>†</sup> | (0.1-8.4)   | 12           | 40,397     | 1.3 <sup>†</sup> | (0.7-2.5)   | 16           | 88,120     | 1.3              | (0.7-2.2)   |
| 16   | Cigar PTU w/CIGS | Exclusive Cigarettes | Exclusive Cigar      | 0            | N/A        | N/A              | N/A         | 2            | 6,210      | 0.2 <sup>†</sup> | (0.0-0.9)   | 2            | 11,957     | 0.2 <sup>†</sup> | (0.0-0.7)   |
| 17   | Cigar PTU w/CIGS | Exclusive Cigarettes | Exclusive Cigarettes | 5            | 12,507     | 4.0 <sup>†</sup> | (1.7-9.0)   | 59           | 202,271    | 6.5              | (4.9-8.4)   | 189          | 1,059,706  | 15.2             | (13.1-17.6) |
| 18   | Cigar PTU w/CIGS | Exclusive Cigarettes | Cigar PTU w/CIGS     | 5            | 9,980      | 3.2 <sup>†</sup> | (1.3-7.5)   | 42           | 149,831    | 4.8              | (3.6-6.4)   | 74           | 403,217    | 5.8              | (4.4-7.6)   |
| 19   | Cigar PTU w/CIGS | Exclusive Cigarettes | Cigar PTU w/o CIGS   | 0            | N/A        | N/A              | N/A         | 0            | N/A        | N/A              | N/A         | 0            | N/A        | N/A              | N/A         |
| 20   | Cigar PTU w/CIGS | Exclusive Cigarettes | CIG PTU w/o Cigar    | 2            | 4,148      | 1.3 <sup>†</sup> | (0.3-5.5)   | 30           | 93,209     | 3.0              | (1.9-4.6)   | 32           | 160,043    | 2.3              | (1.6-3.3)   |
| 21   | Cigar PTU w/CIGS | Exclusive Cigarettes | All Other            | 0            | N/A        | N/A              | N/A         | 6            | 22,473     | 0.7 <sup>†</sup> | (0.3-1.8)   | 2            | 10,057     | 0.1 <sup>†</sup> | (0.0-0.6)   |
| 22   | Cigar PTU w/CIGS | Cigar PTU w/CIGS     | No Tobacco           | 8            | 15,708     | 5.0 <sup>†</sup> | (2.4-10.2)  | 31           | 94,530     | 3.0              | (2.1-4.3)   | 16           | 83,088     | 1.2              | (0.7-2.0)   |
| 23   | Cigar PTU w/CIGS | Cigar PTU w/CIGS     | Exclusive Cigar      | 0            | N/A        | N/A              | N/A         | 8            | 26,736     | 0.9 <sup>†</sup> | (0.4-1.8)   | 20           | 119,482    | 1.7              | (1.0-3.0)   |
| 24   | Cigar PTU w/CIGS | Cigar PTU w/CIGS     | Exclusive Cigarettes | 4            | 6,993      | 2.2 <sup>†</sup> | (0.8-6.1)   | 89           | 309,945    | 9.9              | (8.0-12.2)  | 123          | 717,594    | 10.3             | (8.4-12.5)  |
| 25   | Cigar PTU w/CIGS | Cigar PTU w/CIGS     | Cigar PTU w/CIGS     | 35           | 77,987     | 25.1             | (17.3-34.9) | 234          | 721,868    | 23.0             | (20.3-26.1) | 412          | 2,107,586  | 30.3             | (27.7-33.0) |
| 26   | Cigar PTU w/CIGS | Cigar PTU w/CIGS     | Cigar PTU w/o CIGS   | 1            | 1,658      | 0.5 <sup>†</sup> | (0.1-3.8)   | 14           | 44,384     | 1.4              | (0.8-2.5)   | 5            | 27,748     | 0.4 <sup>†</sup> | (0.2-1.0)   |
| 27   | Cigar PTU w/CIGS | Cigar PTU w/CIGS     | CIG PTU w/o Cigar    | 11           | 23,501     | 7.6              | (4.4-12.7)  | 68           | 220,117    | 7.0              | (5.3-9.3)   | 78           | 425,820    | 6.1              | (4.9-7.6)   |
| 28   | Cigar PTU w/CIGS | Cigar PTU w/CIGS     | All Other            | 2            | 4,205      | 1.4 <sup>†</sup> | (0.3-5.3)   | 8            | 33,310     | 1.1 <sup>†</sup> | (0.5-2.2)   | 13           | 85,265     | 1.2              | (0.7-2.2)   |
| 29   | Cigar PTU w/CIGS | Cigar PTU w/o CIGS   | No Tobacco           | 2            | 3,998      | 1.3 <sup>†</sup> | (0.3-5.7)   | 4            | 13,933     | 0.4 <sup>†</sup> | (0.1-1.3)   | 0            | N/A        | N/A              | N/A         |
| 30   | Cigar PTU w/CIGS | Cigar PTU w/o CIGS   | Exclusive Cigar      | 0            | N/A        | N/A              | N/A         | 4            | 9,272      | 0.3 <sup>†</sup> | (0.1-0.8)   | 3            | 16,821     | 0.2 <sup>†</sup> | (0.1-0.7)   |
| 31   | Cigar PTU w/CIGS | Cigar PTU w/o CIGS   | Exclusive Cigarettes | 0            | N/A        | N/A              | N/A         | 1            | 4,446      | 0.1 <sup>†</sup> | (0.0-1.3)   | 2            | 8,780      | 0.1 <sup>†</sup> | (0.0-0.5)   |
| 32   | Cigar PTU w/CIGS | Cigar PTU w/o CIGS   | Cigar PTU w/CIGS     | 0            | N/A        | N/A              | N/A         | 7            | 21,530     | 0.7 <sup>†</sup> | (0.3-1.5)   | 9            | 49,337     | 0.7 <sup>†</sup> | (0.3-1.9)   |
| 33   | Cigar PTU w/CIGS | Cigar PTU w/o CIGS   | Cigar PTU w/o CIGS   | 2            | 6,006      | 1.9 <sup>†</sup> | (0.5-7.8)   | 7            | 26,164     | 0.8 <sup>†</sup> | (0.4-1.8)   | 3            | 18,923     | 0.3 <sup>†</sup> | (0.1-0.9)   |
| 34   | Cigar PTU w/CIGS | Cigar PTU w/o CIGS   | CIG PTU w/o Cigar    | 2            | 5,179      | 1.7 <sup>†</sup> | (0.4-6.8)   | 2            | 8,568      | 0.3 <sup>†</sup> | (0.1-1.1)   | 0            | N/A        | N/A              | N/A         |
| 35   | Cigar PTU w/CIGS | Cigar PTU w/o CIGS   | All Other            | 0            | N/A        | N/A              | N/A         | 2            | 5,687      | 0.2 <sup>†</sup> | (0.0-0.8)   | 4            | 24,529     | 0.4 <sup>†</sup> | (0.1-1.0)   |
| 36   | Cigar PTU w/CIGS | CIG PTU w/o Cigar    | No Tobacco           | 3            | 6,453      | 2.1 <sup>†</sup> | (0.6-6.7)   | 13           | 44,555     | 1.4              | (0.8-2.4)   | 7            | 40,320     | 0.6 <sup>†</sup> | (0.2-1.4)   |
| 37   | Cigar PTU w/CIGS | CIG PTU w/o Cigar    | Exclusive Cigar      | 0            | N/A        | N/A              | N/A         | 0            | N/A        | N/A              | N/A         | 1            | 8,162      | 0.1 <sup>†</sup> | (0.0-0.9)   |
| 38   | Cigar PTU w/CIGS | CIG PTU w/o Cigar    | Exclusive Cigarettes | 3            | 7,313      | 2.3 <sup>†</sup> | (0.7-8.0)   | 42           | 146,074    | 4.7              | (3.4-6.4)   | 53           | 292,077    | 4.2              | (3.1-5.7)   |
| 39   | Cigar PTU w/CIGS | CIG PTU w/o Cigar    | Cigar PTU w/CIGS     | 4            | 8,022      | 2.6 <sup>†</sup> | (1.0-6.6)   | 41           | 157,194    | 5.0              | (3.6-6.9)   | 40           | 222,043    | 3.2              | (2.3-4.4)   |
| 40   | Cigar PTU w/CIGS | CIG PTU w/o Cigar    | Cigar PTU w/o CIGS   | 0            | N/A        | N/A              | N/A         | 2            | 11,289     | 0.4 <sup>†</sup> | (0.1-1.4)   | 1            | 3,556      | 0.1 <sup>†</sup> | (0.0-0.4)   |
| 41   | Cigar PTU w/CIGS | CIG PTU w/o Cigar    | CIG PTU w/o Cigar    | 11           | 26,038     | 8.4 <sup>†</sup> | (4.5-15.1)  | 44           | 162,664    | 5.2              | (3.8-7.0)   | 59           | 334,847    | 4.8              | (3.5-6.5)   |
| 42   | Cigar PTU w/CIGS | CIG PTU w/o Cigar    | All Other            | 2            | 4,258      | 1.4 <sup>†</sup> | (0.3-6.7)   | 12           | 60,040     | 1.9 <sup>†</sup> | (1.0-3.8)   | 5            | 20,814     | 0.3 <sup>†</sup> | (0.1-0.8)   |
| 43   | Cigar PTU w/CIGS | All Other            | No Tobacco           | 2            | 4,884      | 1.6 <sup>†</sup> | (0.4-5.9)   | 9            | 36,395     | 1.2 <sup>†</sup> | (0.5-2.6)   | 3            | 13,761     | 0.2 <sup>†</sup> | (0.1-0.6)   |
| 44   | Cigar PTU w/CIGS | All Other            | Exclusive Cigar      | 0            | N/A        | N/A              | N/A         | 0            | N/A        | N/A              | N/A         | 1            | 3,852      | 0.1 <sup>†</sup> | (0.0-0.4)   |
| 45   | Cigar PTU w/CIGS | All Other            | Exclusive Cigarettes | 0            | N/A        | N/A              | N/A         | 4            | 14,196     | 0.5 <sup>†</sup> | (0.2-1.3)   | 3            | 14,724     | 0.2 <sup>†</sup> | (0.1-0.7)   |
| 46   | Cigar PTU w/CIGS | All Other            | Cigar PTU w/CIGS     | 1            | 1,734      | 0.6 <sup>†</sup> | (0.1-4.4)   | 5            | 15,681     | 0.5 <sup>†</sup> | (0.2-1.3)   | 3            | 14,993     | 0.2 <sup>†</sup> | (0.1-0.7)   |
| 47   | Cigar PTU w/CIGS | All Other            | Cigar PTU w/o CIGS   | 0            | N/A        | N/A              | N/A         | 5            | 18,648     | 0.6 <sup>†</sup> | (0.2-1.5)   | 2            | 6,859      | 0.1 <sup>†</sup> | (0.0-0.4)   |
| 48   | Cigar PTU w/CIGS | All Other            | CIG PTU w/o Cigar    | 3            | 6,777      | 2.2 <sup>†</sup> | (0.7-7.0)   | 5            | 15,291     | 0.5 <sup>†</sup> | (0.2-1.2)   | 7            | 36,736     | 0.5 <sup>†</sup> | (0.3-1.1)   |
| 49   | Cigar PTU w/CIGS | All Other            | All Other            | 1            | 2,545      | 0.8 <sup>†</sup> | (0.1-4.7)   | 17           | 55,585     | 1.8              | (1.1-2.9)   | 13           | 66,896     | 1.0 <sup>†</sup> | (0.5-1.9)   |

## Notes:

Abbreviations: P30D = past 30-day; W2 = Wave 2; W3 = Wave 3; W1 = Wave 1; w/ = with; CIG(S) = cigarette(s); CI = confidence interval; PTU = polytobacco use; w/o = without; N/A = not applicable

The analysis included youth (ages 12-17), young adult (ages 18-24), and adult 25+ (ages 25 and older) W1 P30D cigar polytobacco users w/CIGS with data at all three waves. Age was calculated based on age at W1. W3 longitudinal (all-waves) weights were used to calculate estimates.

The weighted percentages for some constructs such as discontinued tobacco and persistent use in this table may not match exactly with those presented in Table 1. This is the result of different denominators. In this table there can be no missing values on tobacco use variables at any wave. Table 1 does not require this restriction since some outcomes reflect behaviors at W3 (e.g. discontinued use by W3), regardless of missing data at Wave 2.

For transitions between waves:

- 1) No tobacco: Defined as no use of any tobacco products within the past 30 days.
- 2) Exclusive cigar: Defined as use of only traditional cigars, cigarillos, and/or filtered cigars within the past 30 days.
- 3) Exclusive cigarettes: Defined as use of only cigarettes within the past 30 days.
- 4) Cigar PTU w/CIGS: Defined as use of traditional cigars, cigarillos, and/or filtered cigars and cigarettes within the past 30 days and possibly one or more of the following: hookah, electronic nicotine delivery system (ENDS<sup>\*</sup>), pipe, or any smokeless tobacco.
- 5) Cigar PTU w/o CIGS: Defined as use of traditional cigars, cigarillos, and/or filtered cigars and one or more of the following within the past 30 days: hookah, ENDS, pipe, or any smokeless tobacco, but not cigarettes.
- 6) CIG PTU w/o cigar: Defined as use of cigarettes and one or more of the following within the past 30 days: hookah, ENDS, pipe, or any smokeless tobacco but not traditional cigars, cigarillos, or filtered cigars.
- 7) All other: Use of one or more of the following in the past 30 days: hookah, ENDS, pipe, or any smokeless tobacco, but without cigarettes, traditional cigars, cigarillos, or filtered cigars.

\*Respondents were asked about P30D use of "e-cigarettes" at W1 and W2 and "e-products" (e-cigarettes, e-cigars, e-pipes, and e-hookah) at W3.

The logit-transformation method was used to calculate the 95% CIs.

† Estimate should be interpreted with caution because it has low statistical precision. It is based on a denominator sample size of less than 50, or the coefficient of variation of the estimate or its complement is larger than 30%.

Analyses were run on the W1, W2, and W3 Public Use Files (<https://doi.org/10.3886/ICPSR36498.v8>).



Supplemental Table 2c: Transitions in P30D Product Use at W2 and W3 Among W1 P30D Cigar Polytobacco Users w/o CIGS.

| Rows | W1                 | W2                   | W3                   | Youth        |            |                  |            | Young Adults |            |                  |            | Adults 25+   |            |                   |            |
|------|--------------------|----------------------|----------------------|--------------|------------|------------------|------------|--------------|------------|------------------|------------|--------------|------------|-------------------|------------|
|      |                    |                      |                      | Unweighted N | Weighted N | Weighted %       | 95% CI     | Unweighted N | Weighted N | Weighted %       | 95% CI     | Unweighted N | Weighted N | Weighted %        | 95% CI     |
| 1    | Cigar PTU w/o CIGS | No Tobacco           | No Tobacco           | 4            | 10,023     | 8.3 <sup>†</sup> | (2.8-22.2) | 23           | 78,312     | 12.6             | (8.5-18.3) | 12           | 84,936     | 11.0 <sup>†</sup> | (5.5-20.8) |
| 2    | Cigar PTU w/o CIGS | No Tobacco           | Exclusive Cigar      | 0            | N/A        | N/A              | N/A        | 2            | 8,513      | 1.4 <sup>†</sup> | (0.3-6.3)  | 0            | N/A        | N/A               | N/A        |
| 3    | Cigar PTU w/o CIGS | No Tobacco           | Exclusive Cigarettes | 0            | N/A        | N/A              | N/A        | 1            | 4,199      | 0.7 <sup>†</sup> | (0.1-4.2)  | 0            | N/A        | N/A               | N/A        |
| 4    | Cigar PTU w/o CIGS | No Tobacco           | Cigar PTU w/CIGS     | 0            | N/A        | N/A              | N/A        | 2            | 9,069      | 1.5 <sup>†</sup> | (0.3-6.2)  | 0            | N/A        | N/A               | N/A        |
| 5    | Cigar PTU w/o CIGS | No Tobacco           | Cigar PTU w/o CIGS   | 2            | 6,952      | 5.8 <sup>†</sup> | (1.3-22.2) | 2            | 5,927      | 1.0 <sup>†</sup> | (0.2-4.1)  | 0            | N/A        | N/A               | N/A        |
| 6    | Cigar PTU w/o CIGS | No Tobacco           | CIG PTU w/o Cigar    | 0            | N/A        | N/A              | N/A        | 0            | N/A        | N/A              | N/A        | 0            | N/A        | N/A               | N/A        |
| 7    | Cigar PTU w/o CIGS | No Tobacco           | All Other            | 5            | 11,308     | 9.4 <sup>†</sup> | (3.5-22.8) | 2            | 9,971      | 1.6 <sup>†</sup> | (0.4-6.3)  | 0            | N/A        | N/A               | N/A        |
| 8    | Cigar PTU w/o CIGS | Exclusive Cigar      | No Tobacco           | 1            | 3,866      | 3.2 <sup>†</sup> | (0.4-22.2) | 7            | 20,399     | 3.3 <sup>†</sup> | (1.5-7.2)  | 6            | 30,838     | 4.0 <sup>†</sup>  | (1.7-9.1)  |
| 9    | Cigar PTU w/o CIGS | Exclusive Cigar      | Exclusive Cigar      | 0            | N/A        | N/A              | N/A        | 6            | 20,307     | 3.3 <sup>†</sup> | (1.5-7.0)  | 11           | 62,045     | 8.1 <sup>†</sup>  | (3.9-16.0) |
| 10   | Cigar PTU w/o CIGS | Exclusive Cigar      | Exclusive Cigarettes | 0            | N/A        | N/A              | N/A        | 0            | N/A        | N/A              | N/A        | 0            | N/A        | N/A               | N/A        |
| 11   | Cigar PTU w/o CIGS | Exclusive Cigar      | Cigar PTU w/CIGS     | 1            | 2,868      | 2.4 <sup>†</sup> | (0.4-14.4) | 1            | 2,483      | 0.4 <sup>†</sup> | (0.1-2.9)  | 1            | 4,420      | 0.6 <sup>†</sup>  | (0.1-4.2)  |
| 12   | Cigar PTU w/o CIGS | Exclusive Cigar      | Cigar PTU w/o CIGS   | 0            | N/A        | N/A              | N/A        | 4            | 17,000     | 2.7 <sup>†</sup> | (0.8-8.8)  | 2            | 16,768     | 2.2 <sup>†</sup>  | (0.4-10.5) |
| 13   | Cigar PTU w/o CIGS | Exclusive Cigar      | CIG PTU w/o Cigar    | 0            | N/A        | N/A              | N/A        | 0            | N/A        | N/A              | N/A        | 0            | N/A        | N/A               | N/A        |
| 14   | Cigar PTU w/o CIGS | Exclusive Cigar      | All Other            | 1            | 2,945      | 2.4 <sup>†</sup> | (0.3-16.6) | 1            | 2,209      | 0.4 <sup>†</sup> | (0.0-2.9)  | 3            | 18,585     | 2.4 <sup>†</sup>  | (0.7-7.6)  |
| 15   | Cigar PTU w/o CIGS | Exclusive Cigarettes | No Tobacco           | 1            | 2,694      | 2.2 <sup>†</sup> | (0.3-14.6) | 0            | N/A        | N/A              | N/A        | 0            | N/A        | N/A               | N/A        |
| 16   | Cigar PTU w/o CIGS | Exclusive Cigarettes | Exclusive Cigar      | 0            | N/A        | N/A              | N/A        | 1            | 5,881      | 0.9 <sup>†</sup> | (0.1-6.4)  | 0            | N/A        | N/A               | N/A        |
| 17   | Cigar PTU w/o CIGS | Exclusive Cigarettes | Exclusive Cigarettes | 0            | N/A        | N/A              | N/A        | 0            | N/A        | N/A              | N/A        | 0            | N/A        | N/A               | N/A        |
| 18   | Cigar PTU w/o CIGS | Exclusive Cigarettes | Cigar PTU w/CIGS     | 0            | N/A        | N/A              | N/A        | 0            | N/A        | N/A              | N/A        | 2            | 15,319     | 2.0 <sup>†</sup>  | (0.5-8.3)  |
| 19   | Cigar PTU w/o CIGS | Exclusive Cigarettes | Cigar PTU w/o CIGS   | 0            | N/A        | N/A              | N/A        | 0            | N/A        | N/A              | N/A        | 0            | N/A        | N/A               | N/A        |
| 20   | Cigar PTU w/o CIGS | Exclusive Cigarettes | CIG PTU w/o Cigar    | 1            | 1,798      | 1.5 <sup>†</sup> | (0.2-10.7) | 0            | N/A        | N/A              | N/A        | 1            | 4,164      | 0.5 <sup>†</sup>  | (0.1-3.6)  |
| 21   | Cigar PTU w/o CIGS | Exclusive Cigarettes | All Other            | 0            | N/A        | N/A              | N/A        | 0            | N/A        | N/A              | N/A        | 0            | N/A        | N/A               | N/A        |
| 22   | Cigar PTU w/o CIGS | Cigar PTU w/CIGS     | No Tobacco           | 2            | 3,172      | 2.6 <sup>†</sup> | (0.6-10.4) | 2            | 6,936      | 1.1 <sup>†</sup> | (0.3-4.4)  | 0            | N/A        | N/A               | N/A        |
| 23   | Cigar PTU w/o CIGS | Cigar PTU w/CIGS     | Exclusive Cigar      | 0            | N/A        | N/A              | N/A        | 3            | 9,151      | 1.5 <sup>†</sup> | (0.5-4.6)  | 7            | 38,996     | 5.1 <sup>†</sup>  | (2.0-12.4) |
| 24   | Cigar PTU w/o CIGS | Cigar PTU w/CIGS     | Exclusive Cigarettes | 1            | 2,313      | 1.9 <sup>†</sup> | (0.2-14.4) | 1            | 2,042      | 0.3 <sup>†</sup> | (0.0-2.5)  | 1            | 6,534      | 0.8 <sup>†</sup>  | (0.1-6.1)  |
| 25   | Cigar PTU w/o CIGS | Cigar PTU w/CIGS     | Cigar PTU w/CIGS     | 4            | 8,242      | 6.9 <sup>†</sup> | (2.6-16.9) | 14           | 48,095     | 7.7              | (4.5-13.0) | 2            | 6,496      | 0.8 <sup>†</sup>  | (0.2-3.5)  |
| 26   | Cigar PTU w/o CIGS | Cigar PTU w/CIGS     | Cigar PTU w/o CIGS   | 2            | 6,332      | 5.3 <sup>†</sup> | (1.2-19.9) | 3            | 10,987     | 1.8 <sup>†</sup> | (0.6-5.4)  | 4            | 24,589     | 3.2 <sup>†</sup>  | (1.2-8.3)  |
| 27   | Cigar PTU w/o CIGS | Cigar PTU w/CIGS     | CIG PTU w/o Cigar    | 0            | N/A        | N/A              | N/A        | 6            | 23,737     | 3.8 <sup>†</sup> | (1.7-8.3)  | 2            | 7,030      | 0.9 <sup>†</sup>  | (0.2-3.7)  |
| 28   | Cigar PTU w/o CIGS | Cigar PTU w/CIGS     | All Other            | 1            | 2,360      | 2.0 <sup>†</sup> | (0.3-12.8) | 0            | N/A        | N/A              | N/A        | 0            | N/A        | N/A               | N/A        |
| 29   | Cigar PTU w/o CIGS | Cigar PTU w/o CIGS   | No Tobacco           | 1            | 1,337      | 1.1 <sup>†</sup> | (0.1-8.8)  | 6            | 33,079     | 5.3 <sup>†</sup> | (2.4-11.6) | 4            | 18,305     | 2.4 <sup>†</sup>  | (0.8-6.5)  |
| 30   | Cigar PTU w/o CIGS | Cigar PTU w/o CIGS   | Exclusive Cigar      | 0            | N/A        | N/A              | N/A        | 2            | 5,818      | 0.9 <sup>†</sup> | (0.2-4.6)  | 6            | 36,171     | 4.7 <sup>†</sup>  | (1.9-10.9) |
| 31   | Cigar PTU w/o CIGS | Cigar PTU w/o CIGS   | Exclusive Cigarettes | 0            | N/A        | N/A              | N/A        | 0            | N/A        | N/A              | N/A        | 0            | N/A        | N/A               | N/A        |
| 32   | Cigar PTU w/o CIGS | Cigar PTU w/o CIGS   | Cigar PTU w/CIGS     | 1            | 3,352      | 2.8 <sup>†</sup> | (0.4-15.7) | 5            | 24,254     | 3.9 <sup>†</sup> | (1.5-9.8)  | 1            | 2,958      | 0.4 <sup>†</sup>  | (0.0-3.1)  |
| 33   | Cigar PTU w/o CIGS | Cigar PTU w/o CIGS   | Cigar PTU w/o CIGS   | 1            | 2,785      | 2.3 <sup>†</sup> | (0.3-14.4) | 18           | 80,013     | 12.9             | (7.8-20.5) | 17           | 76,967     | 10.0              | (6.7-14.6) |
| 34   | Cigar PTU w/o CIGS | Cigar PTU w/o CIGS   | CIG PTU w/o Cigar    | 1            | 2,859      | 2.4 <sup>†</sup> | (0.3-14.9) | 2            | 8,949      | 1.4 <sup>†</sup> | (0.3-6.4)  | 1            | 1,850      | 0.2 <sup>†</sup>  | (0.0-1.8)  |
| 35   | Cigar PTU w/o CIGS | Cigar PTU w/o CIGS   | All Other            | 1            | 3,074      | 2.6 <sup>†</sup> | (0.3-17.6) | 7            | 32,226     | 5.2 <sup>†</sup> | (2.3-11.3) | 8            | 44,277     | 5.7 <sup>†</sup>  | (2.3-13.6) |
| 36   | Cigar PTU w/o CIGS | CIG PTU w/o Cigar    | No Tobacco           | 0            | N/A        | N/A              | N/A        | 1            | 3,875      | 0.6 <sup>†</sup> | (0.1-4.8)  | 1            | 5,738      | 0.7 <sup>†</sup>  | (0.1-5.5)  |
| 37   | Cigar PTU w/o CIGS | CIG PTU w/o Cigar    | Exclusive Cigar      | 0            | N/A        | N/A              | N/A        | 0            | N/A        | N/A              | N/A        | 0            | N/A        | N/A               | N/A        |
| 38   | Cigar PTU w/o CIGS | CIG PTU w/o Cigar    | Exclusive Cigarettes | 1            | 2,235      | 1.9 <sup>†</sup> | (0.2-13.4) | 1            | 3,136      | 0.5 <sup>†</sup> | (0.1-3.5)  | 1            | 9,631      | 1.3 <sup>†</sup>  | (0.2-8.4)  |
| 39   | Cigar PTU w/o CIGS | CIG PTU w/o Cigar    | Cigar PTU w/CIGS     | 2            | 10,877     | 9.0 <sup>†</sup> | (2.1-31.9) | 1            | 1,779      | 0.3 <sup>†</sup> | (0.0-2.2)  | 1            | 7,040      | 0.9 <sup>†</sup>  | (0.1-6.5)  |
| 40   | Cigar PTU w/o CIGS | CIG PTU w/o Cigar    | Cigar PTU w/o CIGS   | 0            | N/A        | N/A              | N/A        | 0            | N/A        | N/A              | N/A        | 0            | N/A        | N/A               | N/A        |
| 41   | Cigar PTU w/o CIGS | CIG PTU w/o Cigar    | CIG PTU w/o Cigar    | 4            | 9,757      | 8.1 <sup>†</sup> | (2.6-22.4) | 1            | 4,595      | 0.7 <sup>†</sup> | (0.1-5.3)  | 1            | 6,630      | 0.9 <sup>†</sup>  | (0.1-6.7)  |
| 42   | Cigar PTU w/o CIGS | CIG PTU w/o Cigar    | All Other            | 1            | 2,028      | 1.7 <sup>†</sup> | (0.2-12.6) | 1            | 3,490      | 0.6 <sup>†</sup> | (0.1-4.3)  | 0            | N/A        | N/A               | N/A        |
| 43   | Cigar PTU w/o CIGS | All Other            | No Tobacco           | 3            | 5,982      | 5.0 <sup>†</sup> | (1.4-16.6) | 8            | 35,131     | 5.6 <sup>†</sup> | (2.7-11.4) | 10           | 59,863     | 7.8 <sup>†</sup>  | (4.0-14.5) |
| 44   | Cigar PTU w/o CIGS | All Other            | Exclusive Cigar      | 0            | N/A        | N/A              | N/A        | 2            | 7,085      | 1.1 <sup>†</sup> | (0.3-4.7)  | 2            | 13,047     | 1.7 <sup>†</sup>  | (0.4-6.8)  |
| 45   | Cigar PTU w/o CIGS | All Other            | Exclusive Cigarettes | 0            | N/A        | N/A              | N/A        | 0            | N/A        | N/A              | N/A        | 0            | N/A        | N/A               | N/A        |
| 46   | Cigar PTU w/o CIGS | All Other            | Cigar PTU w/CIGS     | 2            | 4,473      | 3.7 <sup>†</sup> | (0.7-17.3) | 3            | 8,534      | 1.4 <sup>†</sup> | (0.4-4.6)  | 0            | N/A        | N/A               | N/A        |
| 47   | Cigar PTU w/o CIGS | All Other            | Cigar PTU w/o CIGS   | 1            | 2,328      | 1.9 <sup>†</sup> | (0.3-12.3) | 6            | 25,094     | 4.0 <sup>†</sup> | (1.5-10.1) | 5            | 39,517     | 5.1 <sup>†</sup>  | (2.0-12.3) |
| 48   | Cigar PTU w/o CIGS | All Other            | CIG PTU w/o Cigar    | 0            | N/A        | N/A              | N/A        | 2            | 6,464      | 1.0 <sup>†</sup> | (0.2-4.5)  | 3            | 22,895     | 3.0 <sup>†</sup>  | (0.6-14.1) |
| 49   | Cigar PTU w/o CIGS | All Other            | All Other            | 1            | 4,319      | 3.6 <sup>†</sup> | (0.5-21.8) | 14           | 53,791     | 8.6              | (5.1-14.3) | 20           | 104,768    | 13.6              | (8.7-20.6) |

## Notes:

Abbreviations: P30D = past 30-day; W2 = Wave 2; W3 = Wave 3; W1 = Wave 1; w/o = without; CIG(S) = cigarette(s); CI = confidence interval; PTU = polytobacco use; w/ = with; N/A = not applicable

The analysis included youth (ages 12-17), young adult (ages 18-24), and adult 25+ (ages 25 and older) W1 P30D cigar polytobacco users w/o CIGS with data at all three waves. Age was calculated based on age at W1. W3 longitudinal (all-waves) weights were used to calculate estimates.

The weighted percentages for some constructs such as discontinued tobacco and persistent use in this table may not match exactly with those presented in Table 1. This is the result of different denominators. In this table there can be no missing values on tobacco use variables at any wave. Table 1 does not require this restriction since some outcomes reflect behaviors at W3 (e.g. discontinued use by W3), regardless of missing data at Wave 2.

For transitions between waves:

- 1) No tobacco: Defined as no use of any tobacco products within the past 30 days.
- 2) Exclusive cigar: Defined as use of only traditional cigars, cigarillos, and/or filtered cigars within the past 30 days.
- 3) Exclusive cigarettes: Defined as use of only cigarettes within the past 30 days.
- 4) Cigar PTU w/CIGS: Defined as use of traditional cigars, cigarillos, and/or filtered cigars and cigarettes within the past 30 days and possibly one or more of the following: hookah, electronic nicotine delivery system (ENDS<sup>†</sup>), pipe, or any smokeless tobacco.
- 5) Cigar PTU w/o CIGS: Defined as use of traditional cigars, cigarillos, and/or filtered cigars and one or more of the following within the past 30 days: hookah, ENDS, pipe, or any smokeless tobacco, but not cigarettes.
- 6) CIG PTU w/o cigar: Defined as use of cigarettes and one or more of the following within the past 30 days: hookah, ENDS, pipe, or any smokeless tobacco but not traditional cigars, cigarillos, or filtered cigars.
- 7) All other: Use of one or more of the following in the past 30 days: hookah, ENDS, pipe, or any smokeless tobacco, but without cigarettes, traditional cigars, cigarillos, or filtered cigars.

\*Respondents were asked about P30D use of "e-cigarettes" at W1 and W2 and "e-products" (e-cigarettes, e-cigars, e-pipes, and e-hookah) at W3.

The logit-transformation method was used to calculate the 95% CIs.

† Estimate should be interpreted with caution because it has low statistical precision. It is based on a denominator sample size of less than 50, or the coefficient of variation of the estimate or its complement is larger than 30%.

Analyses were run on the W1, W2, and W3 Public Use Files (<https://doi.org/10.3886/ICPSR36498.v8>).
